# Supplementary material for: Sewage Pollution Promotes the Invasion-Related Traits of Impatiens glandulifera in an Oligotrophic Habitat of the Sharr Mountain (Western Balkans)
Source: MDPI journal article supplement (doi:10.3390/plants10122814), 2021-12-20
Supplement: s1 [file s1]

## Sewage pollution promotes the invasion-related traits of *Impatiens glandulifera* in an oligotrophic habitat of the Sharr mountain (Western Balkans)

**Table S1:** List of species with the estimated cover abundance > 1% spontaneously occurring in the resident vegetation invaded by *Impatiens glandulifera* (Štrpce/Shtërpçë municipality, mountainous area in the Southeast Kosovo). Sites/habitats are coded as in Table 1. Nomenclature follows the W3 TROPICOS database of the Missouri Botanical Garden.

| Species in resident vegetation               | Invaded habitats |   |   |
|----------------------------------------------|------------------|---|---|
|                                              | A                | B | C |
| <i>Agrimonia eupatoria</i> L.                |                  | + |   |
| <i>Agrostis alba</i> L.                      | +                | + |   |
| <i>Ajuga reptans</i> L.                      |                  |   | + |
| <i>Alnus glutinosa</i> (L.) Geartn.          | +                | + |   |
| <i>Amaranthus retroflexus</i> L.             | +                |   | + |
| <i>Anchusa officinalis</i> (L.) Gouan        |                  |   | + |
| <i>Anthriscus sylvestris</i> (L.) Hoffm.     | +                | + |   |
| <i>Arctium lappa</i> L.                      | +                |   | + |
| <i>Aruncus dioicus</i> (Walter) Fernald      |                  | + |   |
| <i>Astrantia minor</i> L.                    |                  | + |   |
| <i>Barbarea vulgaris</i> W.T. Alton          | +                | + | + |
| <i>Bidens tripartita</i> L.                  | +                | + |   |
| <i>Bromus sterilis</i> L.                    |                  |   | + |
| <i>Calystegia sepium</i> (L.) R. Br.         | +                | + |   |
| <i>Cardamine bulbifera</i> (L.) Crantz       |                  |   |   |
| <i>Carex sylvatica</i> Huds.                 | +                | + |   |
| <i>Carum carvi</i> L.                        |                  | + |   |
| <i>Cephalanthera rubra</i> (L.) Rich.        |                  | + |   |
| <i>Chaerophyllum aureum</i> L.               | +                | + |   |
| <i>Chamaenerion angustifolium</i> (L.) Scop. |                  | + |   |
| <i>Chelidonium majus</i> L.                  | +                | + |   |
| <i>Chenopodium album</i> L.                  | +                |   | + |
| <i>Cichorium intybus</i> L.                  |                  |   | + |
| <i>Cirsium arvense</i> (L.) Scop.            | +                |   | + |
| <i>Clematis vitalba</i> L.                   | +                | + |   |
| <i>Cornus sanguinea</i> L.                   | +                | + |   |
| <i>Crepis biennis</i> L.                     | +                | + | + |
| <i>Cruciata laevipes</i> Opiz                |                  | + | + |
| <i>Dactylis glomerata</i> L.                 | +                |   | + |
| <i>Daucus carota</i> L.                      |                  |   | + |
| <i>Elymus repens</i> (L.) Gould              |                  |   | + |
| <i>Erigeron canadensis</i> L.                |                  |   | + |
| <i>Euphorbia helioscopia</i> L.              |                  | + | + |
| <i>Fallopia convolvulus</i> (L.) Á. Löve     |                  |   | + |
| <i>Filipendula ulmaria</i> (L.) Maxim.       |                  | + |   |
| <i>Fraxinus ornus</i> L.                     | +                | + |   |

|                                                             |   |   |   |
|-------------------------------------------------------------|---|---|---|
| <i>Galium aparine</i> L.                                    |   | + | + |
| <i>Geranium mole</i> L.                                     |   |   | + |
| <i>Geranium phaeum</i> L.                                   |   | + |   |
| <i>Geum urbanum</i> L.                                      |   | + | + |
| <i>Glechoma hederacea</i> L.                                |   | + |   |
| <i>Heracleum sphondylium</i> L.                             |   | + |   |
| <i>Hordeum murinum</i> L.                                   |   |   | + |
| <i>Impatiens komarovii</i> Pobed.                           |   | + |   |
| <i>Lamium maculatum</i> L.                                  | + | + | + |
| <i>Lythrum salicaria</i> L.                                 |   | + |   |
| <i>Malva sylvestris</i> L.                                  |   |   | + |
| <i>Medicago arabica</i> (L.) Huds.                          |   |   | + |
| <i>Melilotus officinalis</i> (L.) Lam.                      |   |   | + |
| <i>Melittis melissophyllum</i> L.                           |   | + |   |
| <i>Mentha longifolia</i> (L.) Huds.                         | + | + | + |
| <i>Myosotis sparsiflora</i> J.C. Mikan                      |   | + |   |
| <i>Myosotis sylvatica</i> Ehrh. ex Hoffm.                   | + | + |   |
| <i>Persicaria lapathifolia</i> (L.) Delarbre                | + |   | + |
| <i>Petasites hybridus</i> (L.) G. Gaertn., B. May & Scherb. | + | + |   |
| <i>Plantago lanceolata</i> L.                               |   |   | + |
| <i>Polygonum aviculare</i> L.                               |   |   | + |
| <i>Populus nigra</i> L.                                     | + | + |   |
| <i>Potentilla reptans</i> L.                                |   |   | + |
| <i>Prunus cerasifera</i> Ehrh.                              | + |   |   |
| <i>Ranunculus repens</i> L.                                 | + | + |   |
| <i>Ranunculus sceleratus</i> L.                             | + |   |   |
| <i>Rorippa sylvestris</i> (L.) Besser                       |   |   |   |
| <i>Rosa canina</i> L.                                       |   | + | + |
| <i>Rubus caesius</i> L.                                     | + | + | + |
| <i>Rumex crispus</i> L.                                     | + |   | + |
| <i>Salix caprea</i> L.                                      | + | + |   |
| <i>Salix elaeagnos</i> Scop.                                | + | + |   |
| <i>Salix viminalis</i> L.                                   |   | + |   |
| <i>Salvia verticillata</i> L.                               |   |   | + |
| <i>Sambucus ebulus</i> L.                                   | + | + | + |
| <i>Sambucus nigra</i> L.                                    | + | + |   |
| <i>Saponaria officinalis</i> L.                             | + | + | + |
| <i>Scutellaria columnae</i> All.                            |   | + |   |
| <i>Setaria italica</i> (L.) P. Beauv.                       |   |   | + |
| <i>Sherardia arvensis</i> L.                                |   | + |   |
| <i>Silene latifolia</i> Poir.                               | + |   | + |
| <i>Sisymbrium officinale</i> (L.) Scop.                     |   |   | + |
| <i>Sonchus arvensis</i> L.                                  | + |   | + |
| <i>Stellaria holostea</i> L.                                |   | + |   |
| <i>Stenactis annua</i> (L.) Cass. ex Less.                  |   |   | + |
| <i>Telekia speciosa</i> (Schreb.) Baumg.                    | + | + |   |
| <i>Thalictrum aquilegiifolium</i> L.                        |   | + |   |

|                                |   |   |   |
|--------------------------------|---|---|---|
| <i>Trifolium pratense</i> L.   |   |   | + |
| <i>Urtica dioica</i> L.        | + | + | + |
| <i>Verbascum phlomoides</i> L. |   |   | + |
| <i>Veronica chamaedrys</i> L.  | + | + | + |
| <i>Vicia cracca</i> L.         |   | + | + |

**Table S2:** Selected soil parameters of non-invaded soils of (semi)natural meadows outside of the flooding zone of the Lepenac river.

| Soil parameter                     | Median | Range         |
|------------------------------------|--------|---------------|
| pH                                 | 6.9    | 6.6 – 7.3     |
| Available P (mg kg <sup>-1</sup> ) | 10.3   | 7.3 – 18.2    |
| Available K (mg kg <sup>-1</sup> ) | 196.1  | 123.5 – 250.3 |
| Total N (%)                        | 0.38   | 0.24 – 0.51   |

Meadows were chiefly dominated by *Danthonia alpina*, *Koeleria pyramidata*, *Dactylis glomerata* or *Arrhenatherum elatius*. Results of 15 samples are presented.

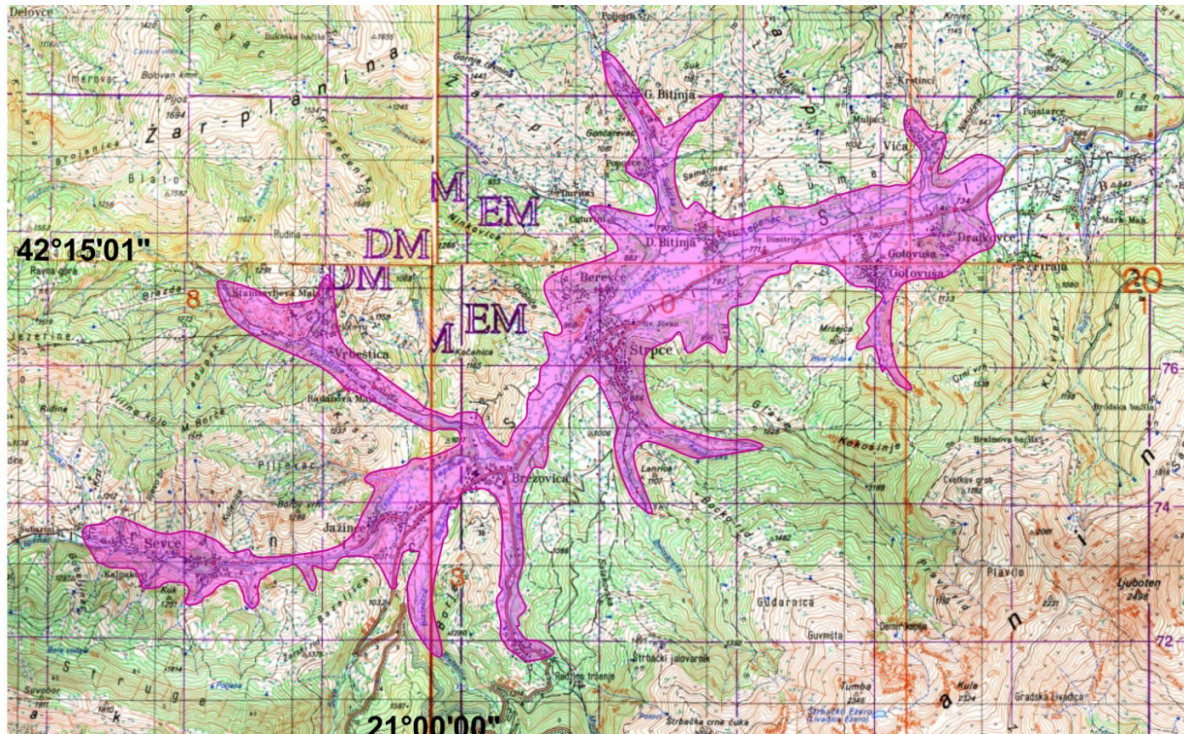

**Figure S1:** Distribution of the well-established *Impatiens glandulifera* stands (purple shade) in the source area of the Lepenac river, in a valley of the Sharr mountain range, southeast Kosovo. The delineated area encompasses individual observations of “significant” (>10 m<sup>2</sup>, or more than 50 individuals) stands of Himalayan balsam separated by <100 m physical distance. Basal topographic map 1:50000 (Vojnogeografski Institut, Belgrade, 1985).
